# Supplementary material
Source: PubMed Central journal article supplement (PMC7049130)
Supplement: pnas.1919197117.sapp.pdf [file pnas.1919197117.sapp.pdf]

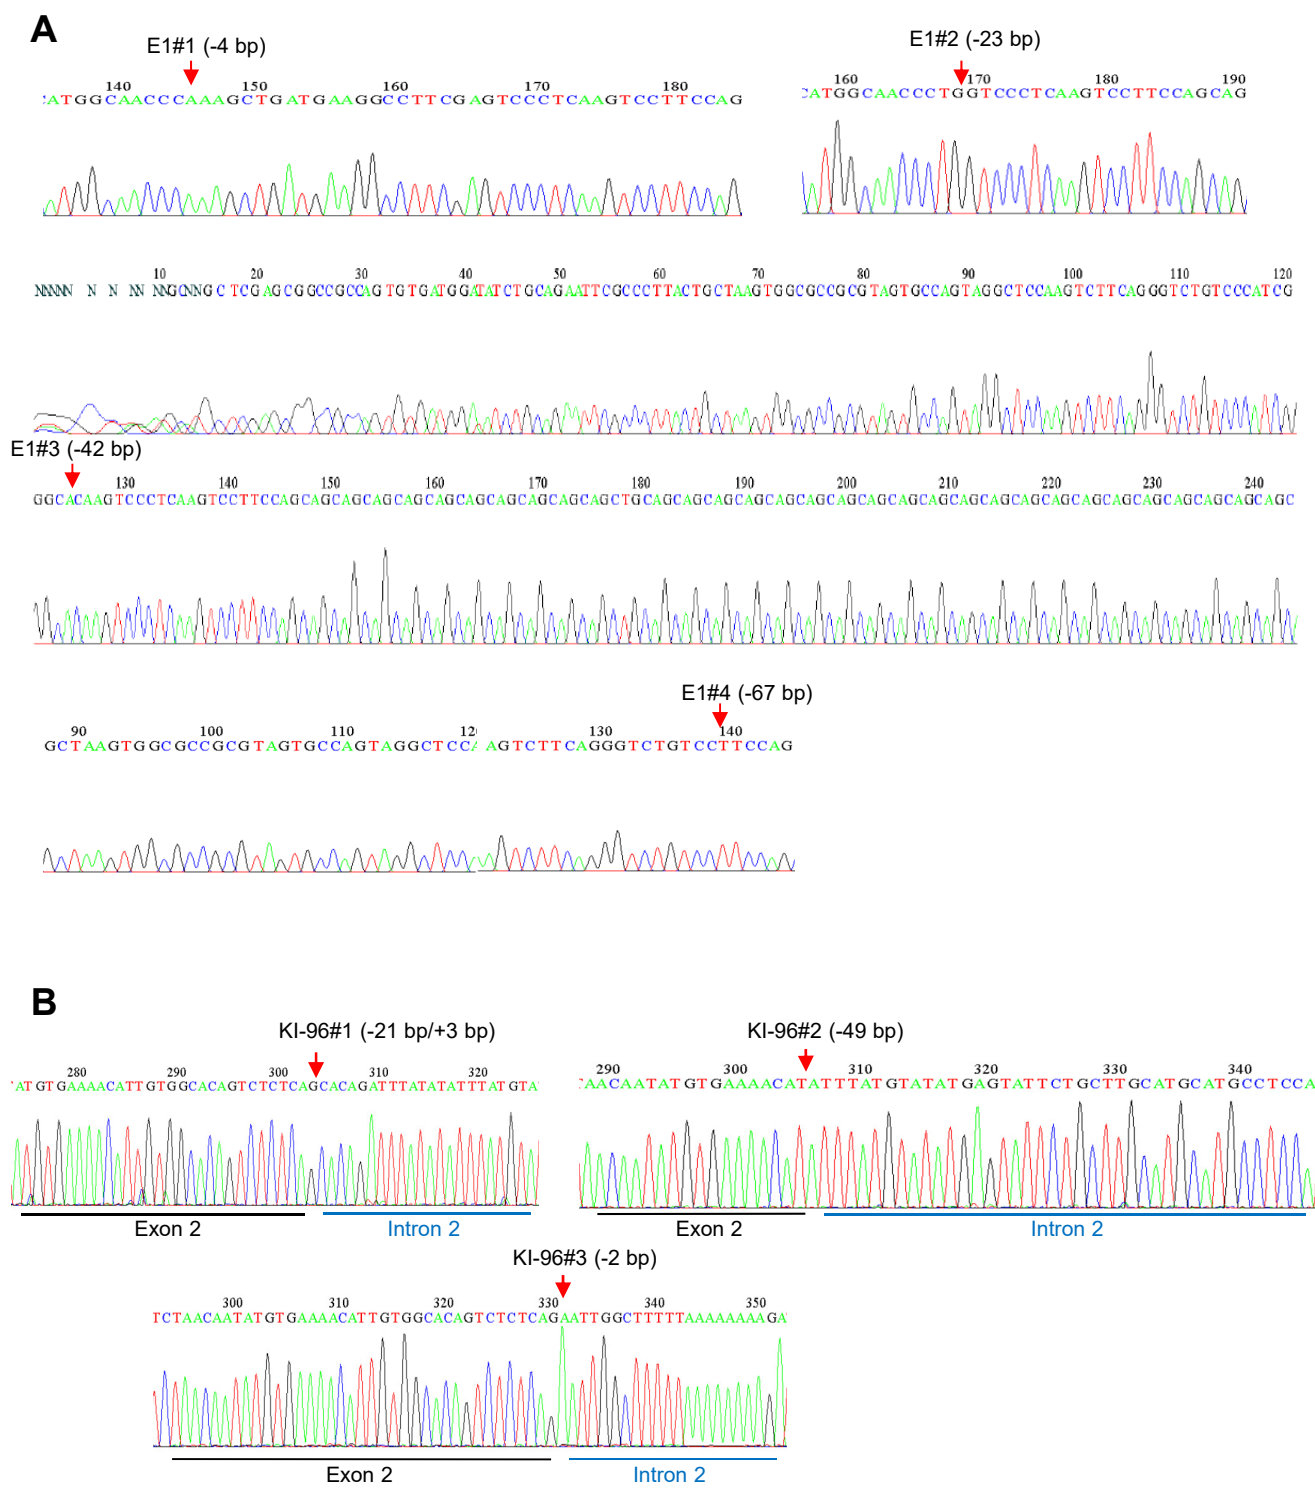

**Supplemental Figure 1.** (A) Sequencing results showing genomic mutations in different lines of E1 mice. (B) Sequencing results showing genomic mutations in different lines of KI-96 mice. Red arrows are used to indicate the locations of mutations.

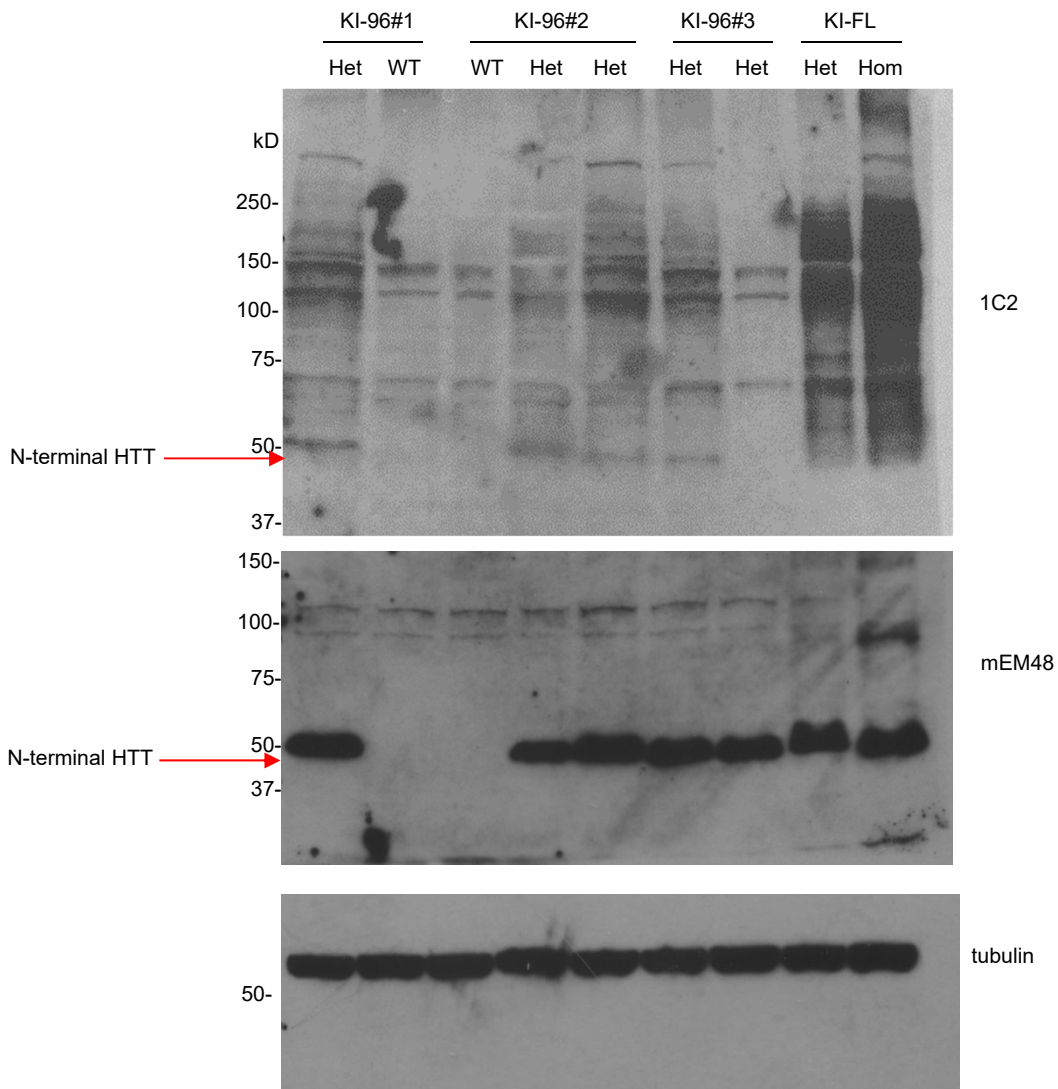

**Supplemental Figure 2.** Western blotting analysis of the cortex tissues of KI-96 mice and full-length HD KI (KI-FL) mice. Anti-polyQ antibody (1C2) revealed full-length mutant HTT and a number of polyQ containing HTT fragments in KI-FL mouse brain. Only the smallest N-terminal HTT fragment is present in KI-96 mouse brains (upper panel). Mouse antibody to N-terminal HTT (mEM48) could clearly detect the smallest N-terminal HTT fragment in KI-96 and KI-FL mouse brains, but not in wild type (WT) mouse brain (middle panel).

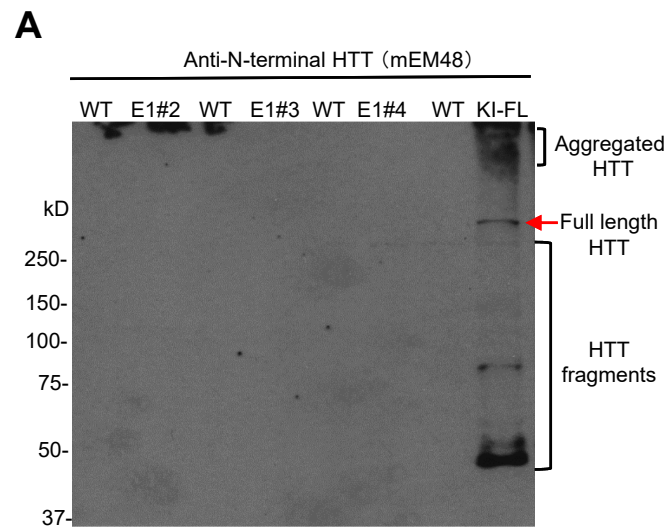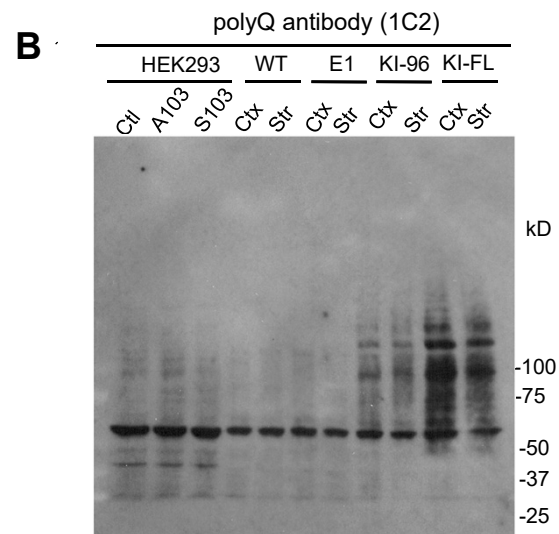

**Supplemental Figure 3. (A)** Western blotting analysis of HTT with polyQ expansion using mEM48 antibody in WT, E1 and KI-FL mice. **(B)** Western blotting analysis of HTT with polyQ expansion using 1C2 antibody in WT, E1, KI-96 and KI-FL mice.

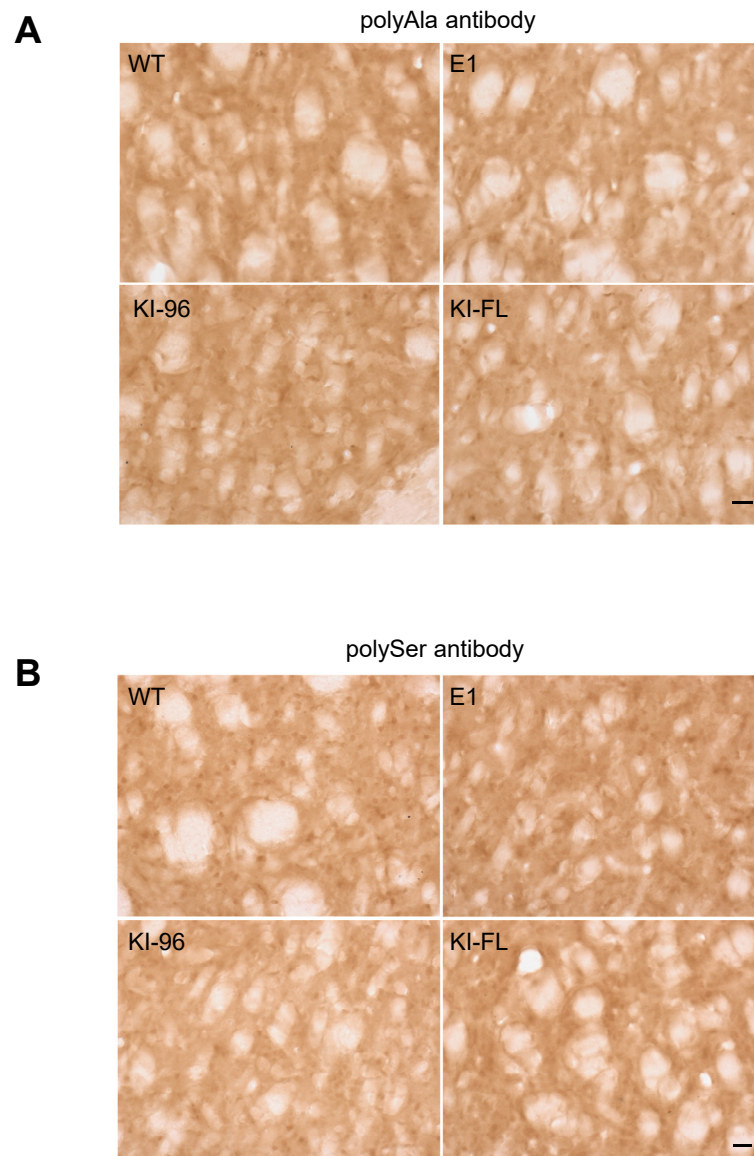

**Supplemental Figure 4. (A)** Immunohistochemistry of the striatum of WT, E1, KI-96 and KI-FL mice using polyAla antibody. **(B)** Immunohistochemistry of the striatum of WT, E1, KI-96 and KI-FL mice using polySer antibody. Scale bar: 50  $\mu$ m.

Supplemental Figure 5

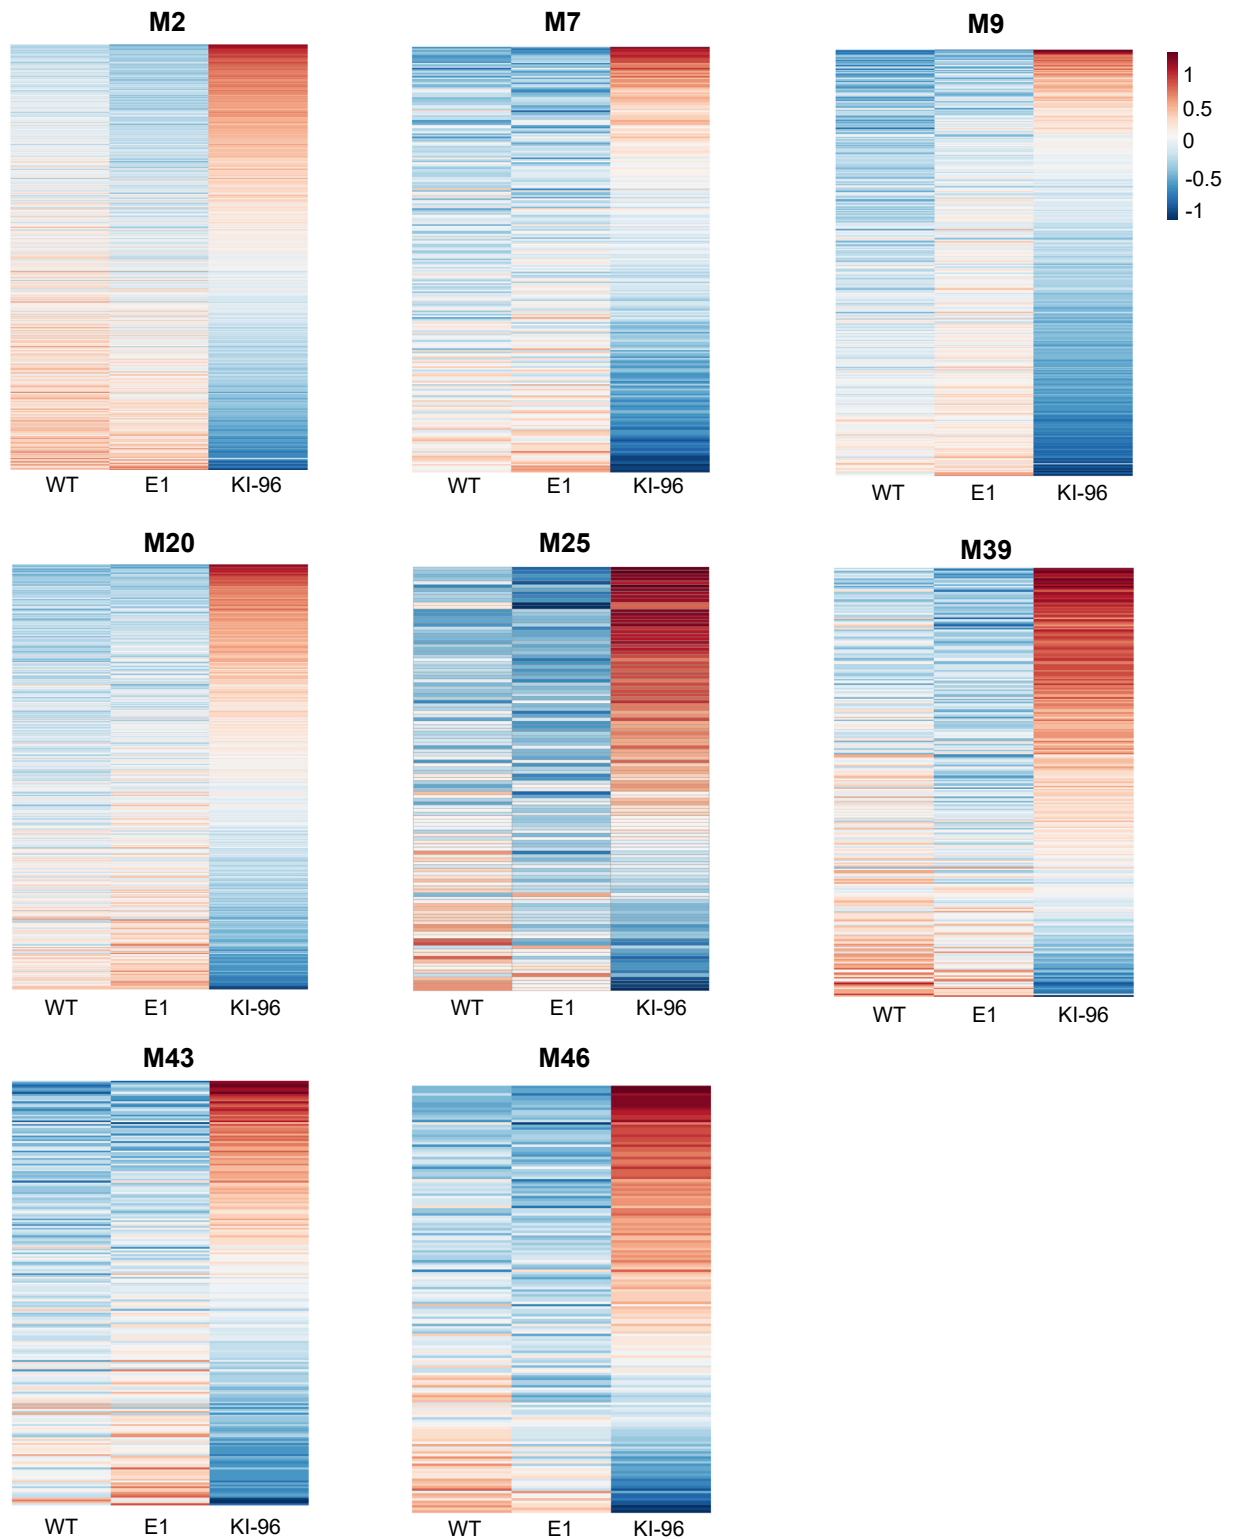

**Supplemental Figure 5.** Heatmap view of gene expression in different striatum modules (M2: repeat-associated HD signaling; M7: cell death signaling; M9: mitochondria and transport; M20: UBI conjugation; M25: glutamate receptor signaling; M39: DNA repair; M43: fatty acid catabolic process; M46: glucocorticoid signaling).

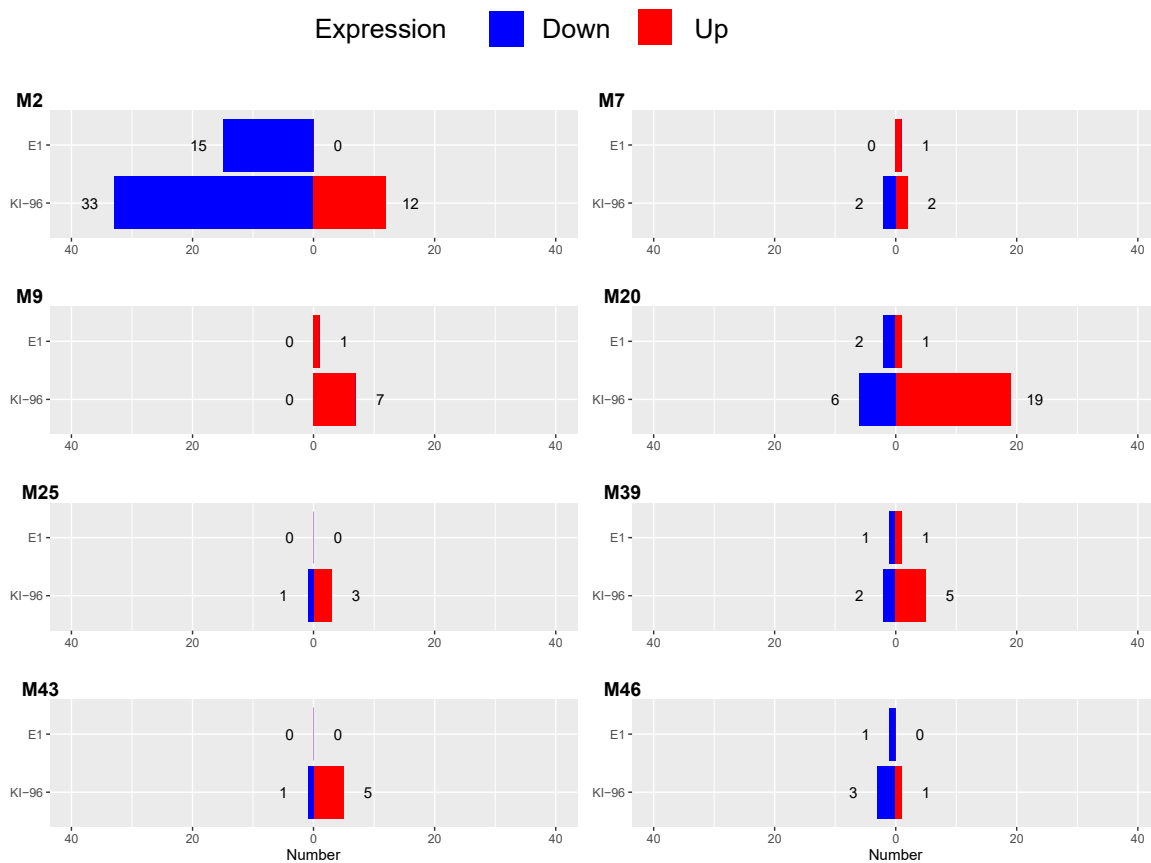

**Supplemental Figure 6.** Overview of significantly changed genes in different striatum modules when comparing E1 or KI-96 mice to WT mice, respectively (M2: repeat-associated HD signaling; M7: cell death signaling; M9: mitochondria and transport; M20: UBI conjugation; M25: glutamate receptor signaling; M39: DNA repair; M43: fatty acid catabolic process; M46: glucocorticoid signaling).
